# Supplementary material for: The 21st-century wetting inhibits growing surface ozone in Northwestern China
Source: Copernicus journal article supplement (doi:10.5194/egusphere-2025-258), 2025-02-24
Supplement: Supplementary file [file egusphere-2025-258-AC2-supplement.pdf]

## Responses to Editor and Referee's comments

First of all, we would like to thank the Editor and Referee for their comments and suggestions, which improved greatly the presentations and interpretations in our revised manuscript. In the revised article, we have addressed all comments and suggestions from the Editor and Referee. Our point-by-point responses to the Referee's comments are outlined below. The Referee's original comments are shown in italics and our responses are given in normal fonts.

### Referee #2

#### Comments:

*The manuscript by Zhang et al. revealed the recent wetting inhibits growing near-surface ozone in remote Northwestern China, an arid and semi-arid region located in the hinterland of the Asian-European continent based on a series of modeling experiments. The study topics of the paper is interesting, and it gives our understanding of variation of near-surface ozone under the background of regional climate change. However, the explanation of the physical and chemical processes in the simulated ozone change should be clarified. More in-depth and detailed analyses are needed to support the conclusion with major revisions:*

**Response:** We thank the Referee's positive and encouraging comments, which help us to improve this article considerably.

*1. Generally, Ozone variations depend both local photochemical production and regional transport. Climatologically, the contribution of foreign ozone (ozone produced outside China's troposphere) in the surface layer distributes as a "western high and eastern low" pattern over China with a large portion of near-surface ozone over Northwestern China with a large portion of near-surface ozone over Northwestern China (Li et al., 2014; Li et al., 2016). The ozone variation over Northwestern China should consider the contribution of foreign ozone.*

#### References

- Li, X., Liu, J., Mauzerall, D.L., Emmons, L.K., Walters, S., Horowitz, L.W., Tao, S., 2014. Effects of trans-Eurasian transport of air pollutants on surface ozone concentrations over Western China. *J. Geophys. Res. Atmos.* 119 (21), 12338 – 12354.
- Li, J., Yang, W., Wang, Z., Chen, H., Hu, B., Li, J., Sun, Y., Fu, P., Zhang, Y., 2016. Modeling study of surface ozone source receptor relationships in East Asia. *Atmos. Res.* 167, 77 – 88.

**Response:** We thank the Referee to raise this question and let us know the previous works regarding the foreign ozone contributions to O<sub>3</sub> pollution in Northwestern China.

Tropospheric O<sub>3</sub> is a primary air pollutant with strong long-range transport potential in the atmosphere among criteria pollutants. Given dominant prevailing westerly winds in the mid-latitudes of the Northern Hemisphere, Northwestern China locates in the upstream of China. One would expect this “upstream” region would receive more O<sub>3</sub> and its precursors from foreign sources in Eurasian countries to the west. This occurred particularly in early years during which China’s O<sub>3</sub> levels were relatively low. Such “upstream” effect tends to diminish in recent years along with increasing O<sub>3</sub> concentrations in China in terms of the atmospheric advection equation, and is also less significant in summer (the season this study focusing on) during which atmospheric circulations are often localized, causing more localized pollution episodes, characterized by increased local emissions combined with enhanced dispersion. The latter does not favor long-range transport.

In fact, the chemical lateral boundary conditions in WRF-Chem already account for pollutant emissions from outside the model boundaries (i.e., upstream areas), as well as the effects of atmospheric transport and chemical transformations that these pollutants undergo before entering a WRF-Chem simulation domain. These boundary conditions typically come from global chemical transport model outputs (e.g., GEOS-Chem, MOZART, CAM-Chem). These global models themselves simulate emissions on a global scale (including upstream regions), chemical reactions, wet and dry deposition, and atmospheric transport processes. These datasets are usually generated or assimilated from global models and observations, also containing information on emissions and transport at the global scale. As a result, the lateral boundary conditions govern the fluxes and concentration levels of pollutants entering the model domain from external (upstream) regions. They represent the environmental or regional background concentration outside the simulation area, which already integrates emissions and transport influences from a broader region (including upstream areas).

The lateral boundary conditions of chemical species in our modeling exercise were estimated from MOZART-4 reanalysis driven fields (Emmons et al., *Geosci. Model. Dev.* 3, 43–67, 2010) on a daily basis. The ERA-Interim data with a 6-hourly time resolution and  $0.7^{\circ} \times 0.7^{\circ}$  lat/lon spatial resolution provided by the ECMWF (European Centre for Medium-Range Weather Forecasts) were adopted as lateral boundary conditions of meteorology. Further, since the multiple model scenario simulations in our study used the same lateral boundary conditions, this effectively removed the effect of precursor emissions and atmospheric transport from Eurasian countries but focused on wetting impact on O<sub>3</sub> evolution in the internal model domain (Northwestern China).

Given that this modeling investigation did not focus on source-sink relationship but on wetting effect on O<sub>3</sub> revolution in Northwestern China, the effect of foreign emissions via chemistry lateral boundary conditions was ignored. This is done by adopting the same lateral boundary conditions in all scenario simulations, their influences were removed in the analysis of the O<sub>3</sub> differences between different model scenarios.

Following the Reviewer's comment, we have added corresponding discussions referring above points and two references recommended by the Referee in a new second paragraph of section 2.1.

In the 1st paragraph of section 2.4, we explicitly clarified the model's capability to capture regional O<sub>3</sub> transport through open chemical boundary conditions. Revised Text: "To initialize and prescribe boundary conditions in the WRF model from 1998 to 2017, meteorological data were sourced from the ERA-Interim reanalysis..... This allows the adoption of the open chemical boundary conditions to dynamically account for cross-regional O<sub>3</sub> and precursor transport, and to resolve both local photochemical production and contributions from transboundary sources, ensuring a comprehensive representation of O<sub>3</sub> dynamics."

Full citations (Emmons et al., 2010; Li et al., 2014; Li et al., 2016) are added to the reference list.

*2. By employing the regional air quality model WRF-Chem, the recent-summer (1998-2017) ozone variations over Northwestern China were simulated. The model simulations with a nudging option in WRF were conducted from June 1st to August 31st in each summer from 1998 to 2017. Are the boundary conditions of meteorology only prescribed in the WRF model without considering the boundary conditions of chemistry in the simulation experiments? the foreign ozone contribution to the region of Northwestern China could not be simulated from 1998 to 2017. Please add a Figure of the WRF-Chem modeling domain.*

**Response:** Please referred to our responses to the Referee's first comment. A new Figure S1 illustrates the WRF-Chem domain (20 km resolution), emphasizing its coverage beyond China to capture foreign ozone contributions.

*3.The variations of ozone including daytime ozone formation and nighttime ozone titration. It is only observed during daytime that surface air temperature facilitates the formation of ozone, and relative humidity inhibits ozone generation on the troposphere. Please investigate the variations of daytime ozone over Northwestern China from 1998 to 2017.*

**Response:** We agree with the Referee that ozone pollution and formation occur mainly on daytime. While daytime ozone formation and nighttime titration are critical for understanding diurnal ozone cycles, our study focuses on interannual ozone trends driven by large-scale meteorological and emission changes over decades. Although long-term ozone trends investigated in our study were constructed on an annual basis, the annual summer ozone concentrations were averaged over hourly concentrations over both daytime and nighttime.

To address the Referee's comment, we have added a new second paragraph in section 2.2. We wrote "Interannual ozone variability in Northwestern China is primarily driven by large-scale meteorological shifts (e.g., warming, humidification) and regional precursor emissions, rather than diurnal processes. Previous studies (Cooper et al., 2014; Li et al., 2020) have revealed that long-term O<sub>3</sub> trends (interannual and interdecadal scales) are robustly represented by seasonal or annual mean concentrations, as diurnal variations associated with daytime photochemistry and nighttime titration are statistically insignificant. For example, Ding et al. (2023) reported that separating daytime and nighttime O<sub>3</sub> yielded negligible differences (>95% correlation) in O<sub>3</sub> trend over a 20-year period in arid seasons in China."

Full citations for Cooper et al. (2014), Li et al. (2020), and Ding et al. (2023) are added to the reference list.

*4.Both Sections 1 Introduction and 4 conclusions are too simple. Please add the reviews on the regional ozone variations over recent years in Northwestern China and the discussions on the uncertainty of this modeling study.*

**Response:** Thank you for your constructive suggestions. We have expanded the Introduction and Conclusions sections to include a detailed review of regional ozone variations and a discussion of modeling uncertainties.
